# Supplementary material for: Location of Pathogen Inoculum in the Potting Substrate Influences Damage by Globisporangium ultimum, Fusarium culmorum and Rhizoctonia solani and Effectiveness of Control Agents in Maize Seedlings
Source: MDPI journal article supplement (doi:10.3390/agronomy12061388), 2022-06-09
Supplement: s1 [file s1]

Archive with 1 entries (1 files):
- agronomy-1726886-supplementary.pdf
