# Supplementary material for: Location of Pathogen Inoculum in the Potting Substrate Influences Damage by Globisporangium ultimum, Fusarium culmorum and Rhizoctonia solani and Effectiveness of Control Agents in Maize Seedlings
Source: MDPI journal article supplement (doi:10.3390/agronomy12061388), 2022-06-09
Supplement: s1 [file s1 › agronomy-1726886-supplementary.pdf]

## Supplementary Material for

### Inoculum Location in The Soil Influences Damage of *Globisporangium ultimum*, *Fusarium culmorum* and *Rhizoctonia solani* and Effectiveness of Control Agents in Maize Seedlings

Eckhard Koch <sup>1</sup>, Petra Zink <sup>1</sup>, Tanja Bernhardt <sup>1</sup>, Tim Birr <sup>2</sup> and Ada Linkies <sup>1,\*</sup>

<sup>1</sup> Julius Kühn Institute, Federal Research Centre for Cultivated Plants, Institute for Biological Control, 69221 Dossenheim, Germany

<sup>2</sup> Department of Plant Diseases and Crop Protection, Institute of Phytopathology, Faculty of Agricultural and Nutritional Science, Christian-Albrechts-University of Kiel, 24118 Kiel, Germany

\* Author for correspondence: Ada Linkies ([Ada.Linkies@Julius-Kuehn.de](mailto:Ada.Linkies@Julius-Kuehn.de))

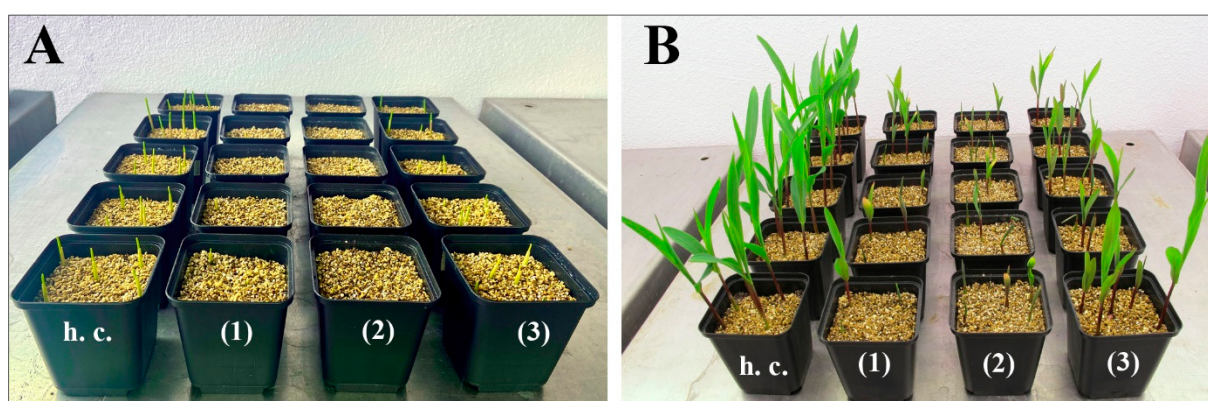

**Figure S1.** Habitus of maize seedlings (A) eight and (B) 14 days after sowing in pots with inoculum of *Rhizoctonia solani* located in different positions. h.c.: healthy control, potting substrate not inoculated; (1) inoculum mixed homogenously in entire pot volume; (2) inoculum present only in upper half of pots; (3) inoculum present only in lower half of pots.

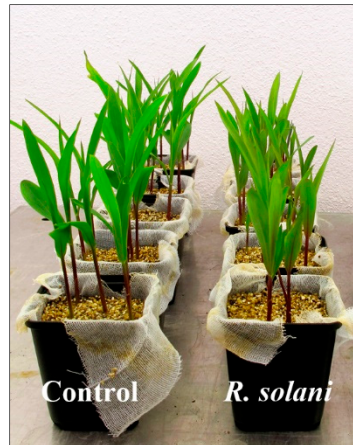

**Figure S2.** Maize seedlings germinated in non-inoculated potting substrate and placed five days after planting on non-inoculated potting substrate (control; **left**) or on potting substrate inoculated with *Rhizoctonia solani* (**right**).
